# Supplementary material for: Iron-doped nickel sulfide nanospheres anchored on reduced graphene oxide for high performance supercapacitors
Source: Royal Society of Chemistry journal article supplement (doi:10.1039/d3qm01335a), 2024-01-01
Supplement: d3qm01335a1.pdf [file d3qm01335a1.pdf]

## Synthesis of iron doped nickel sulfide/rGO as an electroactive material for asymmetric supercapacitors

*Xiangqun Zeng<sup>1</sup>, Mengyuan Yang<sup>1</sup>, Jie Zhao<sup>1, 4\*</sup>, Jiao-Jing Shao<sup>2\*</sup>, Zhao Ding<sup>3</sup>*

1 School of Chemistry and Chemical Engineering, Guizhou University, Guiyang 550025, China.

2 School of Materials and Metallurgy, Guizhou University, Guiyang 550025, China

3 College of Big Data and Information Engineering, Guizhou University, Guiyang 550025, China.

4 Collaborative Innovation Center of Guizhou Province for Efficient Utilization of Phosphorus and Fluorine Resources, Guizhou University, Guiyang, 550025, Guizhou, China.

\*Corresponding author: Jie Zhao, E-mail address: jiezhaol08@163.com; Jiaojing Shao: shaojiao\_jing@163.com

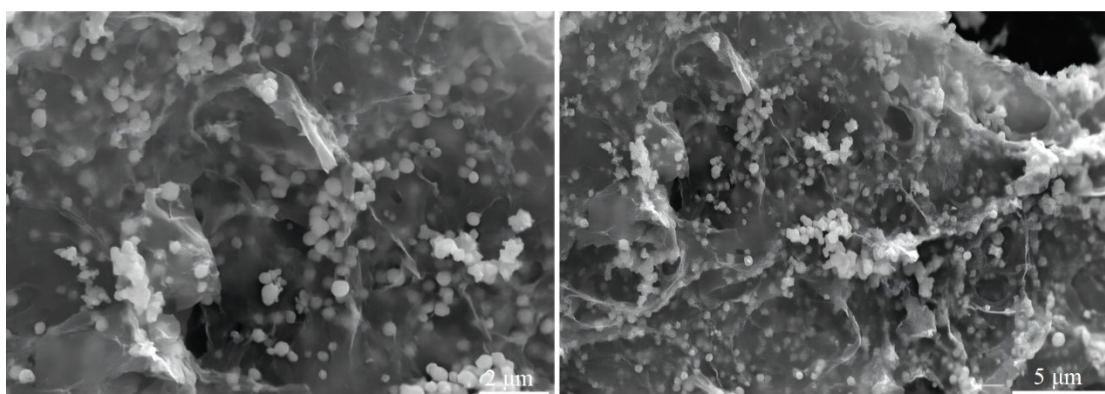

Figure S1 SEM images of Ni-S/rGO.

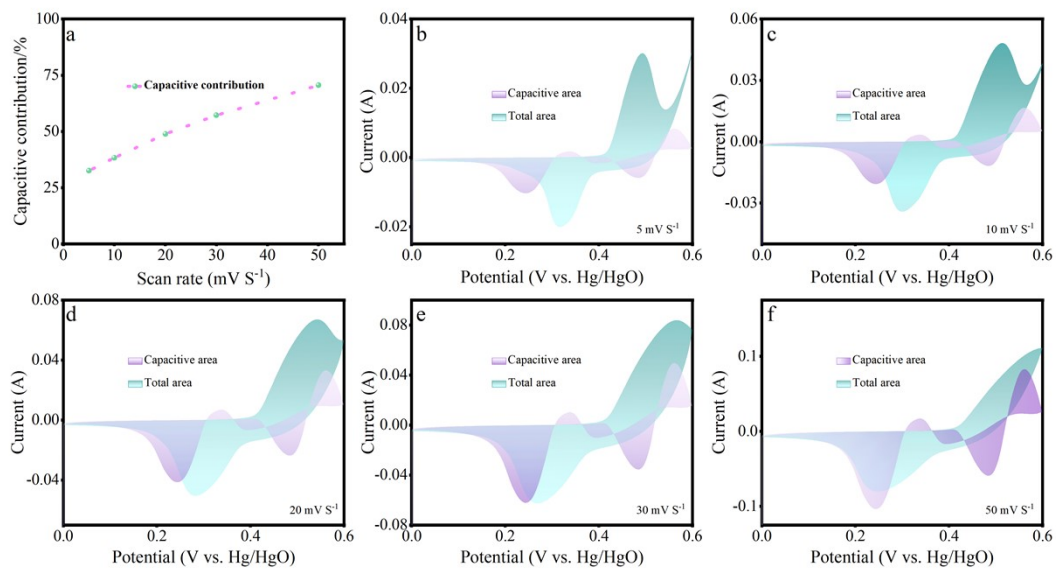

Figure S2 capacitive contributions to the total current at different scan rates.

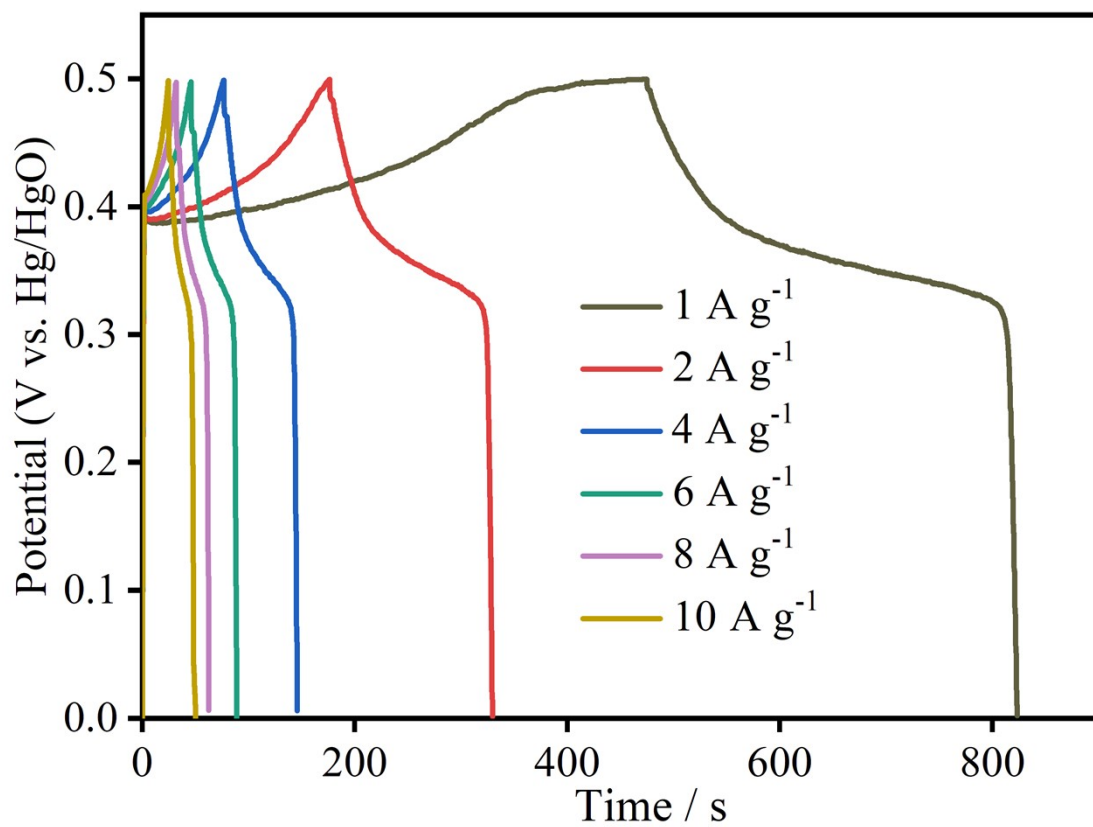

Figure S3 GCD curves at varied current densities for Fe-Ni-S

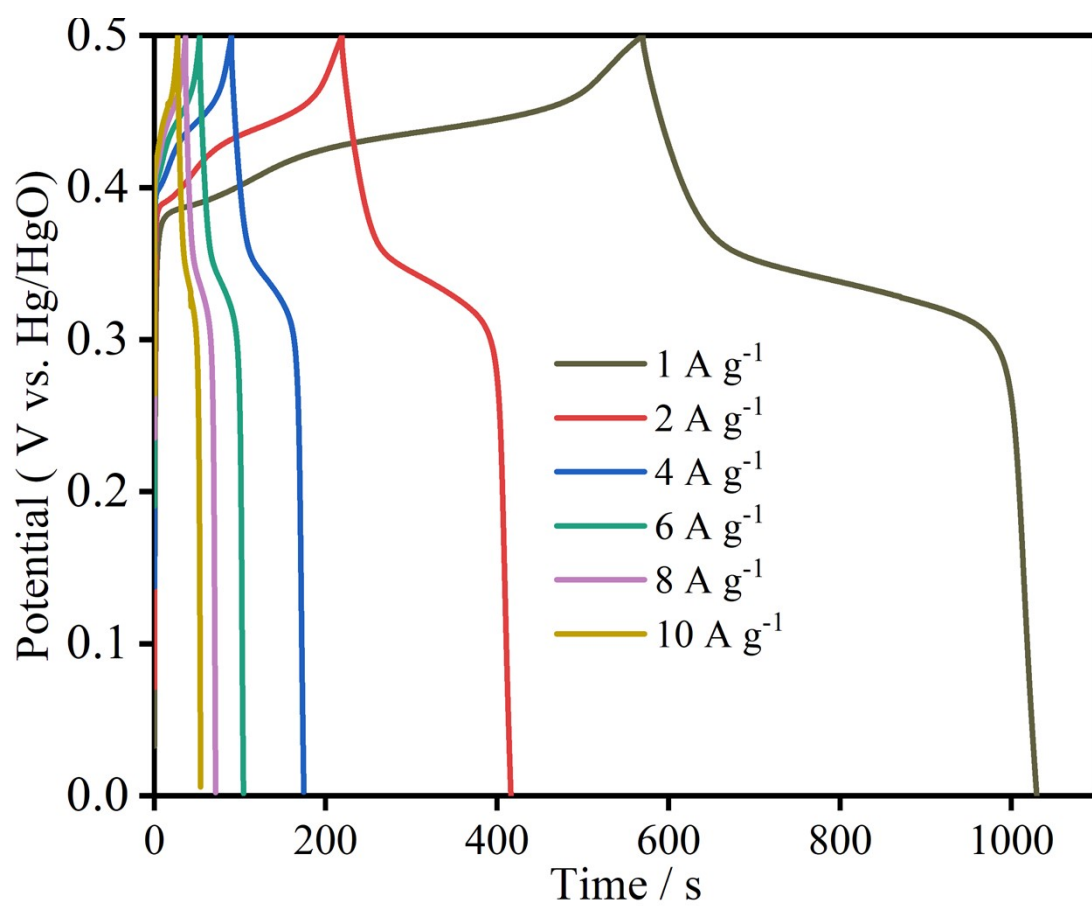

Figure S4 GCD curves at varied current densities for Ni-S/rGO

Table S1 The 2 $\theta$  values observed in the XRD patterns of Fe-Ni-S/rGO and Ni-S/rGO.

| Fe-Ni-S/rGO         | Ni-S/rGO            |                                      |
|---------------------|---------------------|--------------------------------------|
| 2 $\theta$ (degree) | 2 $\theta$ (degree) | Description                          |
| 30.1                | 30.1                | Ni <sub>0.96</sub> S(100)            |
| 34.5                | 34.6                | Ni <sub>0.96</sub> S(101)            |
| 45.7                | 45.8                | Ni <sub>0.96</sub> S(102)            |
| 53.5                | 53.6                | Ni <sub>0.96</sub> S(110)            |
| 21.3                | 21.3                | Ni <sub>3</sub> S <sub>2</sub> (101) |
| 73.0                | 73.1                | Ni <sub>3</sub> S <sub>2</sub> (214) |
| 31.5                | 31.6                | NiS <sub>2</sub> (200)               |
| 38.9                | 39.0                | NiS <sub>2</sub> (211)               |

Table. S2. Comparison of electrochemical performance for NiS based electrode.

| Materials                               | Electrolyte | Max. SC                                         | Rate Performance             | Refs.     |
|-----------------------------------------|-------------|-------------------------------------------------|------------------------------|-----------|
| NiS                                     | 3 M KOH     | 1122.7 F·g <sup>-1</sup> /1 A·g <sup>-1</sup>   | 28%/30 A·g <sup>-1</sup>     | 1         |
| NiS/NHCS                                | 2 M KOH     | 1150 F·g <sup>-1</sup> /1 A·g <sup>-1</sup>     | 52.2%/20 A·g <sup>-1</sup>   | 2         |
| NiS                                     | 3 M KOH     | 1315.4 F·g <sup>-1</sup> /1 A·g <sup>-1</sup>   | 24.2%/30 A·g <sup>-1</sup>   | 3         |
| NiS                                     | 2 M KOH     | 515.98 C·g <sup>-1</sup> /1 A·g <sup>-1</sup>   | 37.6%/50 A·g <sup>-1</sup>   | 4         |
| P-NiS                                   | 2 M KOH     | 727.79 C·g <sup>-1</sup> /1 A·g <sup>-1</sup>   | 50.6%/50 A·g <sup>-1</sup>   | 4         |
| r-FeNi <sub>2</sub> S <sub>4</sub> -rGO | 6 M KOH     | 746.8 C g <sup>-1</sup> /1 A g <sup>-1</sup>    | 49.01%/10 A g <sup>-1</sup>  | 5         |
| NiFe-S/NF                               | 6 M KOH     | 884.9 F g <sup>-1</sup> /1 A g <sup>-1</sup>    | 73.79%/10 A g <sup>-1</sup>  | 6         |
| NiS <sub>2</sub> /GO                    | 2 M KOH     | 1020 F g <sup>-1</sup> /1 A g <sup>-1</sup>     | 55.68%/5 A g <sup>-1</sup>   | 7         |
| NiS/NF                                  | 3 M KOH     | 1279.8 F g <sup>-1</sup> /7.5 A g <sup>-1</sup> | 70.5%/12.5 A g <sup>-1</sup> | 8         |
| NiCo <sub>2</sub> S <sub>4</sub> /CNF   | 3 M KOH     | 757.97 C g <sup>-1</sup> /1 A g <sup>-1</sup>   | 86%/ 20 A g <sup>-1</sup>    | 9         |
| Fe-NiS@MWCNTs/NF                        | 1.5 M KOH   | 662 C g <sup>-1</sup> /5 mV s <sup>-1</sup>     | 70.2%/100 mV s <sup>-1</sup> | 10        |
| NiS/NF                                  | 3 M KOH     | 613 F g <sup>-1</sup> /1.1 A g <sup>-1</sup>    | 80%/2.8 A g <sup>-1</sup>    | 11        |
| SS-NiS@3DNF                             | 3 M KOH     | 694 F g <sup>-1</sup> /1 A g <sup>-1</sup>      | 41.5%/6 A g <sup>-1</sup>    | 12        |
| NiS/CF@NiS                              | 6 M KOH     | 1691.1 F g <sup>-1</sup> /1 A g <sup>-1</sup>   | 60.3%/10 A g <sup>-1</sup>   | 13        |
| carbon sphere@NiS                       | 3 M KOH     | 1022 F g <sup>-1</sup> /1A g <sup>-1</sup>      | 61.7%/10 A g <sup>-1</sup>   | 14        |
| NiS hollow cubes                        | 2 M KOH     | 874.5 F g <sup>-1</sup> /1 A g <sup>-1</sup>    | 60.3%/10 A g <sup>-1</sup>   | 15        |
| NiS/TC-g-C <sub>3</sub> N <sub>4</sub>  | 6 M KOH     | 1162 F g <sup>-1</sup> /1 A g <sup>-1</sup>     |                              | 16        |
| NiS                                     | 2 M KOH     | 529 F g <sup>-1</sup> /2 A g <sup>-1</sup>      | 23.06%/30 A g <sup>-1</sup>  | 17        |
| NiS-CFs                                 | 2 M KOH     | 635.1 F g <sup>-1</sup> /1 A g <sup>-1</sup>    | 67.88%/10 A g <sup>-1</sup>  | 18        |
| NiS/RGO                                 | 6 M KOH     | 302 F g <sup>-1</sup> /1.1 A g <sup>-1</sup>    |                              | 19        |
| NiS@NF                                  | 6 M KOH     | 603.9 F g <sup>-1</sup> /1 A g <sup>-1</sup>    | 30.65%/10 A g <sup>-1</sup>  | 20        |
| rGO- Ni <sub>3</sub> S <sub>2</sub>     | 6 M KOH     | 616 C g <sup>-1</sup> /1 A g <sup>-1</sup>      | 52.27%/20 A g <sup>-1</sup>  | 21        |
| NiO/NiS                                 | 3 M KOH     | 386.7 F g <sup>-1</sup> /1 A g <sup>-1</sup>    | 45%/10 A g <sup>-1</sup>     | 22        |
| SS-NiS@3DNF-E-3                         | 2 M KOH     | 694 F g <sup>-1</sup> /1A g <sup>-1</sup>       | 41.5%/6 A g <sup>-1</sup>    | 23        |
| NiS                                     | 2 M KOH     | 964 F g <sup>-1</sup> /1 A g <sup>-1</sup>      | 49.6%/10 A g <sup>-1</sup>   | 24        |
| rGO@Ni <sub>3</sub> S <sub>2</sub> /CC  | 1 M KOH     | 501.23 C g <sup>-1</sup>                        | 78.2%/10 A g <sup>-1</sup>   | 25        |
| Fe-Ni-S/rGO                             | 3 M KOH     | 1220 F g <sup>-1</sup> /1 A g <sup>-1</sup>     | 75.4%/10 A g <sup>-1</sup>   | This work |

Table S3 A comparison of the Ni@CNTs@Co<sub>9</sub>S<sub>8</sub>/NCNTs asymmetric supercapacitor device with those of advanced supercapacitors recently reported.

| Supercapacitor devices                                                | Energy density<br>(Wh kg <sup>-1</sup> ) | Power density<br>(W kg <sup>-1</sup> ) | Cyclic stability                              | Ref. |
|-----------------------------------------------------------------------|------------------------------------------|----------------------------------------|-----------------------------------------------|------|
| Ni-Co-S//AC                                                           | 30.1<br>16.89                            | 800.2<br>7800                          | 82%, 30 A g <sup>-1</sup><br>10000 cycles     | 26   |
| NiCo <sub>2</sub> S <sub>4</sub> /Co <sub>9</sub> S <sub>8</sub> //AC | 33.5<br>17.5                             | 150<br>3375                            | 70%, 3 A g <sup>-1</sup><br>5000 cycles       | 27   |
| CC/h-Co <sub>9</sub> S <sub>8</sub> /NiCo-Mo//AC                      | 37.6                                     | 228.7                                  | 87.7%, 20 mA cm <sup>-2</sup><br>10000 cycles | 28   |
| NiS/NF//NiS/NF                                                        | 27.58                                    | 1320                                   | 97%, 10 A g <sup>-1</sup><br>5000 cycles      | 11   |
| NiS@CoS//AC                                                           | 24.1                                     | 752.15                                 | 80%,<br>5000 cycles                           | 29   |
| Mn-NiS NSs//ONAC                                                      | 44.2                                     | 825                                    | 90%, 8 A g <sup>-1</sup><br>5000 cycles       | 30   |
| Ni-Mn-S//AC                                                           | 27.3                                     | 505.2                                  | 75.3%, 8 mA cm <sup>-2</sup><br>6000 cycles   | 31   |
| NiMn-S//AC                                                            | 82.2                                     | 800                                    | 81.1%, 10 A g <sup>-1</sup><br>10000 cycles   | 32   |
| MnCo <sub>2</sub> S <sub>4</sub> /CC//PCP/rGO                         | 43                                       | 801                                    | 87%, 10 A g <sup>-1</sup><br>10000 cycles     | 33   |
| FeNi <sub>2</sub> S <sub>4</sub> -rGO//AC                             | 43.4                                     | 800                                    | 87.1%, 4 A g <sup>-1</sup><br>1000 cycles     | 5    |
| Ni <sub>3</sub> S <sub>2</sub> //pen ink                              | 8.2                                      | 214.6                                  | 93.1%, 2.4 A g <sup>-1</sup><br>3000 cycles   | 34   |
| ppy@Ni <sub>3</sub> S <sub>2</sub> //AC                               | 17.5                                     | 179.3                                  | 100.1%, 30 mA cm <sup>-2</sup><br>3000 cycles | 35   |
| rGO/Ni <sub>3</sub> S <sub>2</sub> (rGO)                              | 29.1                                     | 390                                    | 86.1%, 5 A g <sup>-1</sup><br>5000 cycles     | 36   |
| Ni <sub>3</sub> S <sub>2</sub> @NF//AC@NF                             | 32                                       | 210.8                                  | 83.9%, 8 mA cm <sup>-2</sup><br>2000 cycles   | 37   |
| NiS-C@rGO//AC                                                         | 44.1                                     | 755                                    | 93.5, 1 A g <sup>-1</sup><br>10000 cycles     | 38   |
| NiS <sub>NF</sub> /CF@NiS <sub>NP</sub> //AC                          | 31.2                                     | 400.1                                  | 87.8%, 5 A g <sup>-1</sup>                    | 13   |



|                                                |      |       |                                           |              |
|------------------------------------------------|------|-------|-------------------------------------------|--------------|
|                                                |      |       | 5000 cycles                               |              |
| NiS hollow cubes//AC                           | 34.9 | 387.5 | 82.8, 4 A g <sup>-1</sup><br>10000 cycles | 15           |
| TC-g-C <sub>3</sub> N <sub>4</sub> /NiS//AC    | 27   | 379   | 87.9%, 5 A g <sup>-1</sup><br>8000 cycles | 16           |
| NiS@C//C                                       | 21.6 | 400   | 84%, 5 A g <sup>-1</sup><br>5000 cycles   | 39           |
| NiS@C QDs-CNTs-rGO/GH                          | 21   | 811   | 82%, 2 A g <sup>-1</sup><br>5000 cycles   | 40           |
| NiS//NiS                                       | 16.5 | 250   | None                                      | 24           |
| NiS-CFs CNFs                                   | 13.8 | 373.9 | 96.4% , 1A g <sup>-1</sup><br>5000 cycles | 18           |
| rGO@Ni <sub>3</sub> S <sub>2</sub> //AC        | 17.2 | 2752  | 79%, 1 A g <sup>-1</sup><br>1000 cycles   | 25           |
| Ni@CNTs@Co <sub>9</sub> S <sub>8</sub> //NCNTs | 30.5 | 800   | 82%, 3 A g <sup>-1</sup><br>10000 cycles  | This<br>work |

## References :

1. B. Guan, Y. Li, B. Yin, K. Liu, D. Wang, H. Zhang and C. Cheng, Synthesis of hierarchical NiS microflowers for high performance asymmetric supercapacitor, *Chem. Eng. J.*, 2017, **308**, 1165-1173.
2. T. Liu, C. Jiang, B. Cheng, W. You and J. Yu, Hierarchical NiS/N-doped carbon composite hollow spheres with excellent supercapacitor performance, *J. Mater. Chem. A*, 2017, **5**, 21257-21265.
3. J. Zhao, B. Guan, B. Hu, Z. Xu, D. Wang and H. Zhang, Vulcanizing time controlled synthesis of NiS microflowers and its application in asymmetric supercapacitors, *Electrochim. Acta*, 2017, **230**, 428-437.
4. L. a. Peng, Y. Tuo, Y. Lin, C. Jia, S. Wang, Y. Zhou and J. Zhang, Synthesis of P-doped NiS as an electrode material for supercapacitors with enhanced rate capability and cycling stability, *New J. Chem.*, 2022, **46**, 6461-6469.
5. Y. Tao, J. Yuan, X. Qian, Q. Meng, J. Zhu, G. He and H. Chen, Spinel-type FeNi<sub>2</sub>S<sub>4</sub> with rich sulfur vacancies grown on reduced graphene oxide toward enhanced supercapacitive performance, *Inorganic Chemistry Frontiers*, 2021, **8**, 2271-2279.
6. M. Naseri, M. Moradi, S. Hajati, J. P. Espinos and M. A. Kiani, Comparative studies on electrochemical energy storage of NiFe-S nanoflake and NiFe-OH towards aqueous supercapacitor, *J Mater Sci: Mater Electron*, 2019, **30**, 4499-4510.
7. M. Lu, M.-y. Sun, X.-h. Guan, X.-m. Chen and G.-S. Wang, Controllable synthesis of hollow spherical nickel chalcogenide (NiS<sub>2</sub> and NiSe<sub>2</sub>) decorated with graphene for efficient supercapacitor electrodes, *Rsc Adv*, 2021, **11**, 11786-11792.
8. K. D. Ikkurthi, S. Srinivasa Rao, J.-W. Ahn, C. D. Sunesh and H.-J. Kim, A cabbage leaf like nanostructure of a NiS@ZnS composite on Ni foam with excellent electrochemical performance for supercapacitors, *Dalton Trans*, 2019, **48**, 578-586.
9. F. Xie, H. Zhu, Y. Qu, J. Hu, H. Tan, K. Wang and L. Sun, Promoted OH<sup>-</sup> adsorption and electron-transfer kinetics by electrospinning mono-disperse NiCo<sub>2</sub>S<sub>4</sub> nanocrystals within porous CNFs for solid asymmetric supercapacitors, *J. Colloid Interface Sci.*, 2024, **657**, 63-74.
10. P. O. Agboola, I. Shakir, Z. A. Almutairi, S. S. Shar and M. F. Aly Aboud, Synergistic effect of Fe (III) doping and MWCNTs integration on the electrochemical performance of nickel sulfide

nanoparticles for hybrid supercapacitor applications, *Physica B: Condensed Matter*, 2023, **659**, 414866.

11. S. Nayak, A. A. Kittur, S. Nayak and B. Murgunde, Binderless nano marigold flower like structure of nickel sulfide electrode for sustainable supercapacitor energy storage applications, *J Energy Storage*, 2023, **62**, 106963.

12. B. T. Al-Abawi, N. Parveen and S. A. Ansari, Controllable synthesis of sphere-shaped interconnected interlinked binder-free nickel sulfide@nickel foam for high-performance supercapacitor applications, *Scientific Reports*, 2022, **12**, 14413.

13. D. Wu, X. Xie, J. Zhang, Y. Ma, C. Hou, X. Sun, X. Yang, Y. Zhang, H. Kimura and W. Du, Embedding NiS nanoflakes in electrospun carbon fibers containing NiS nanoparticles for hybrid supercapacitors, *Chem. Eng. J.*, 2022, **446**, 137262.

14. A. Simon Justin, P. Vickraman and B. Joji Reddy, Carbon Sphere@Nickel sulfide core-shell nanocomposite for high performance supercapacitor application, *Current Applied Physics*, 2019, **19**, 295-302.

15. X. Ma, L. Zhang, G. Xu, C. Zhang, H. Song, Y. He, C. Zhang and D. Jia, Facile synthesis of NiS hierarchical hollow cubes via Ni formate frameworks for high performance supercapacitors, *Chem. Eng. J.*, 2017, **320**, 22-28.

16. X. Sun, H. Yang, H. Zhu, L. Wang, Z. Fu, Q. Zhang and H. Zhu, Synthesis and enhanced supercapacitor performance of carbon self-doping graphitic carbon nitride/NiS electrode material, *J. Am. Ceram. Soc.*, 2021, **104**, 1554-1567.

17. S. Nandhini and G. Muralidharan, 2018.

18. F. Tong, X. Wu, W. Jia, J. Guo, Y. Pan, Y. Lv, D. Jia and X. Zhao, NiS nanosheets with novel structure anchored on coal-based carbon fibers prepared by electrospinning for flexible supercapacitors, *CrystEngComm*, 2020, **22**, 1625-1632.

19. N. A. Marand, S. M. Masoudpanah, S. Alamolhoda and M. S. Bafghi, Solution combustion synthesis of nickel sulfide/reduced graphene oxide composite powders as electrode materials for high-performance supercapacitors, *J Energy Storage*, 2021, **39**.

20. N. Parveen, S. A. Ansari, S. G. Ansari, H. Fouad, N. M. Abd El-Salam and M. H. Cho, Solid-state symmetrical supercapacitor based on hierarchical flower-like nickel sulfide with shape-controlled morphological evolution, *Electrochim. Acta*, 2018, **268**, 82-93.

21. A. Namdarian, A. G. Tabrizi, A. Maselena, A. Mohammadi and S. E. Moosavifard, One step synthesis of rGO-Ni<sub>3</sub>S<sub>2</sub> nano-cubes composite for high-performance supercapacitor electrodes, *Int. J. Hydrogen Energy*, 2018, **43**, 17780-17787.
22. S.-Y. Kim, C. V. V. M. Gopi, A. E. Reddy and H.-J. Kim, Facile synthesis of a NiO/NiS hybrid and its use as an efficient electrode material for supercapacitor applications, *New J. Chem.*, 2018, **42**, 5309-5313.
23. B. T. Al-Abawi, N. Parveen and S. A. Ansari, Controllable synthesis of sphere-shaped interconnected interlinked binder-free nickel sulfide@nickel foam for high-performance supercapacitor applications, *Scientific Reports*, 2022, **12**.
24. N. S, J. C. M. A and M. G, Facile microwave-hydrothermal synthesis of NiS nanostructures for supercapacitor applications, *Appl. Surf. Sci.*, 2018, **449**, 485-491.
25. Z. Tian, J. Yin, X. Wang and Y. Wang, Construction of Ni<sub>3</sub>S<sub>2</sub> wrapped by rGO on carbon cloth for flexible supercapacitor application, *J. Alloys Compd.*, 2019, **777**, 806-811.
26. W. Zhao, Y. Zheng, L. Cui, D. Jia, D. Wei, R. Zheng, C. Barrow, W. Yang and J. Liu, MOF derived Ni-Co-S nanosheets on electrochemically activated carbon cloth via an etching/ion exchange method for wearable hybrid supercapacitors, *Chem. Eng. J.*, 2019, **371**, 461-469.
27. L. Hou, Y. Shi, S. Zhu, M. Rehan, G. Pang, X. Zhang and C. Yuan, Hollow mesoporous hetero-NiCo<sub>2</sub>S<sub>4</sub>/Co<sub>9</sub>S<sub>8</sub> submicro-spindles: unusual formation and excellent pseudocapitance towards hybrid supercapacitors, *J. Mater. Chem. A*, 2017, **5**, 133-144.
28. Y. Pan, J. Wei, D. Han, Q. Xu, D. Gao, Y. Yang and Y. Wei, Hetero-nanostructures constructed by 2D porous metal oxide/hydroxide nanosheets supported on 1D hollow Co<sub>9</sub>S<sub>8</sub> nanowires for hybrid supercapacitors with high areal capacity, *Inorganic Chemistry Frontiers*, 2021, **8**, 4676-4684.
29. Y. Miao, X. Zhang, J. Zhan, Y. Sui, J. Qi, F. Wei, Q. Meng, Y. He, Y. Ren, Z. Zhan and Z. Sun, Hierarchical NiS@CoS with Controllable Core-Shell Structure by Two-Step Strategy for Supercapacitor Electrodes, *Advanced Materials Interfaces*, 2020, **7**, 1901618.
30. R. K. Devi, M. Ganesan, T.-W. Chen, S.-M. Chen, M. Akilarasan, S.-P. Rwei, J. Yu, T. Elayappan and A. Shaju, A facile strategy for the synthesis of manganese-doped nickel sulfide nanosheets and oxygen, nitrogen-enriched 3D-graphene-like porous carbon for hybrid supercapacitor, *J. Alloys Compd.*, 2023, **944**, 169261.

31. H. Cai, X. Li, G. Li, H. Xia, P. Wang, P. Sun, J. Huang, L. Wang and Y. Yang, Synthesis of honeycomb-like nickel-manganese sulfide composite nanosheets as advanced battery-type electrodes for hybrid supercapacitor, *Mater. Lett.*, 2019, **255**, 126505.
32. X. Wang, C. Hao, J. Zhang, C. Ni, X. Wang and Y. Shen, Reasonable design and synthesis of nickel manganese sulfide nanoparticles derived from metal organic frameworks as electrode materials for supercapacitors, *J. Power Sources*, 2022, **539**, 231594.
33. A. M. Elshahawy, X. Li, H. Zhang, Y. Hu, K. H. Ho, C. Guan and J. Wang, Controllable  $\text{MnCo}_2\text{S}_4$  nanostructures for high performance hybrid supercapacitors, *J. Mater. Chem. A*, 2017, **5**, 7494-7506.
34. J. Wen, S. Li, K. Zhou, Z. Song, B. Li, Z. Chen, T. Chen, Y. Guo and G. Fang, Flexible coaxial-type fiber solid-state asymmetrical supercapacitor based on  $\text{Ni}_3\text{S}_2$  nanorod array and pen ink electrodes, *Journal of Power Sources*, 2016, **324**, 325-333.
35. L. Long, Y. Yao, M. Yan, H. Wang, G. Zhang, M. Kong, L. Yang, X. Liao, G. Yin and Z. Huang,  $\text{Ni}_3\text{S}_2$ @polypyrrole composite supported on nickel foam with improved rate capability and cycling durability for asymmetric supercapacitor device applications, *Journal of Materials Science*, 2016, **52**, 3642-3656.
36. N. Wang, G. Han, Y. Chang, W. Hou, Y. Xiao and H. Li, Preparing  $\text{Ni}_3\text{S}_2$  composite with neural network-like structure for high-performance flexible asymmetric supercapacitors, *Electrochim. Acta*, 2019, **317**, 322-332.
37. M. Shen, J. Liu, T. Liu, C. Yang, Y. He, Z. Li, J. Li and D. Qian, Oxidant-assisted direct-sulfidization of nickel foam toward a self-supported hierarchical  $\text{Ni}_3\text{S}_2$ @Ni electrode for asymmetric all-solid-state supercapacitors, *J. Power Sources*, 2020, **448**.
38. M. Beemarao, P. Periyannan and K. Ravichandran, High-performance supercapacitor electrode obtained by directly bonding 2D materials: hierarchal  $\text{NiS}_2$  on reduced graphene oxide, *Journal of Materials Science: Materials in Electronics*, 2023, **34**.
39. J. Wu, F. Wei, Y. Sui, J. Qi and X. Zhang, Interconnected  $\text{NiS}$ -nanosheets@porous carbon derived from Zeolitic-imidazolate frameworks (ZIFs) as electrode materials for high-performance hybrid supercapacitors, *Int. J. Hydrogen Energy*, 2020, **45**, 19237-19245.

40. R. Zhang, C. Lu, Z. Shi, T. Liu, T. Zhai and W. Zhou, Hexagonal phase NiS octahedrons co-modified by 0D-, 1D-, and 2D carbon materials for high-performance supercapacitor, *Electrochim. Acta*, 2019, **311**, 83-91.
